# Supplementary material for: Plasmonic colloidosomes of black gold for solar energy harvesting and hotspots directed catalysis for CO2 to fuel conversion
Source: Royal Society of Chemistry journal article supplement (doi:10.1039/c9sc02369k), 2019-01-01
Supplement: c9sc02369k5.pdf [file c9sc02369k5.pdf]

# SHINE ON BLACK GOLD FOR A BRIGHTER FUTURE

When exposed to light, gold (Au) nanoparticles (NPs) generate catalysing "hot" electrons and "hotspots"

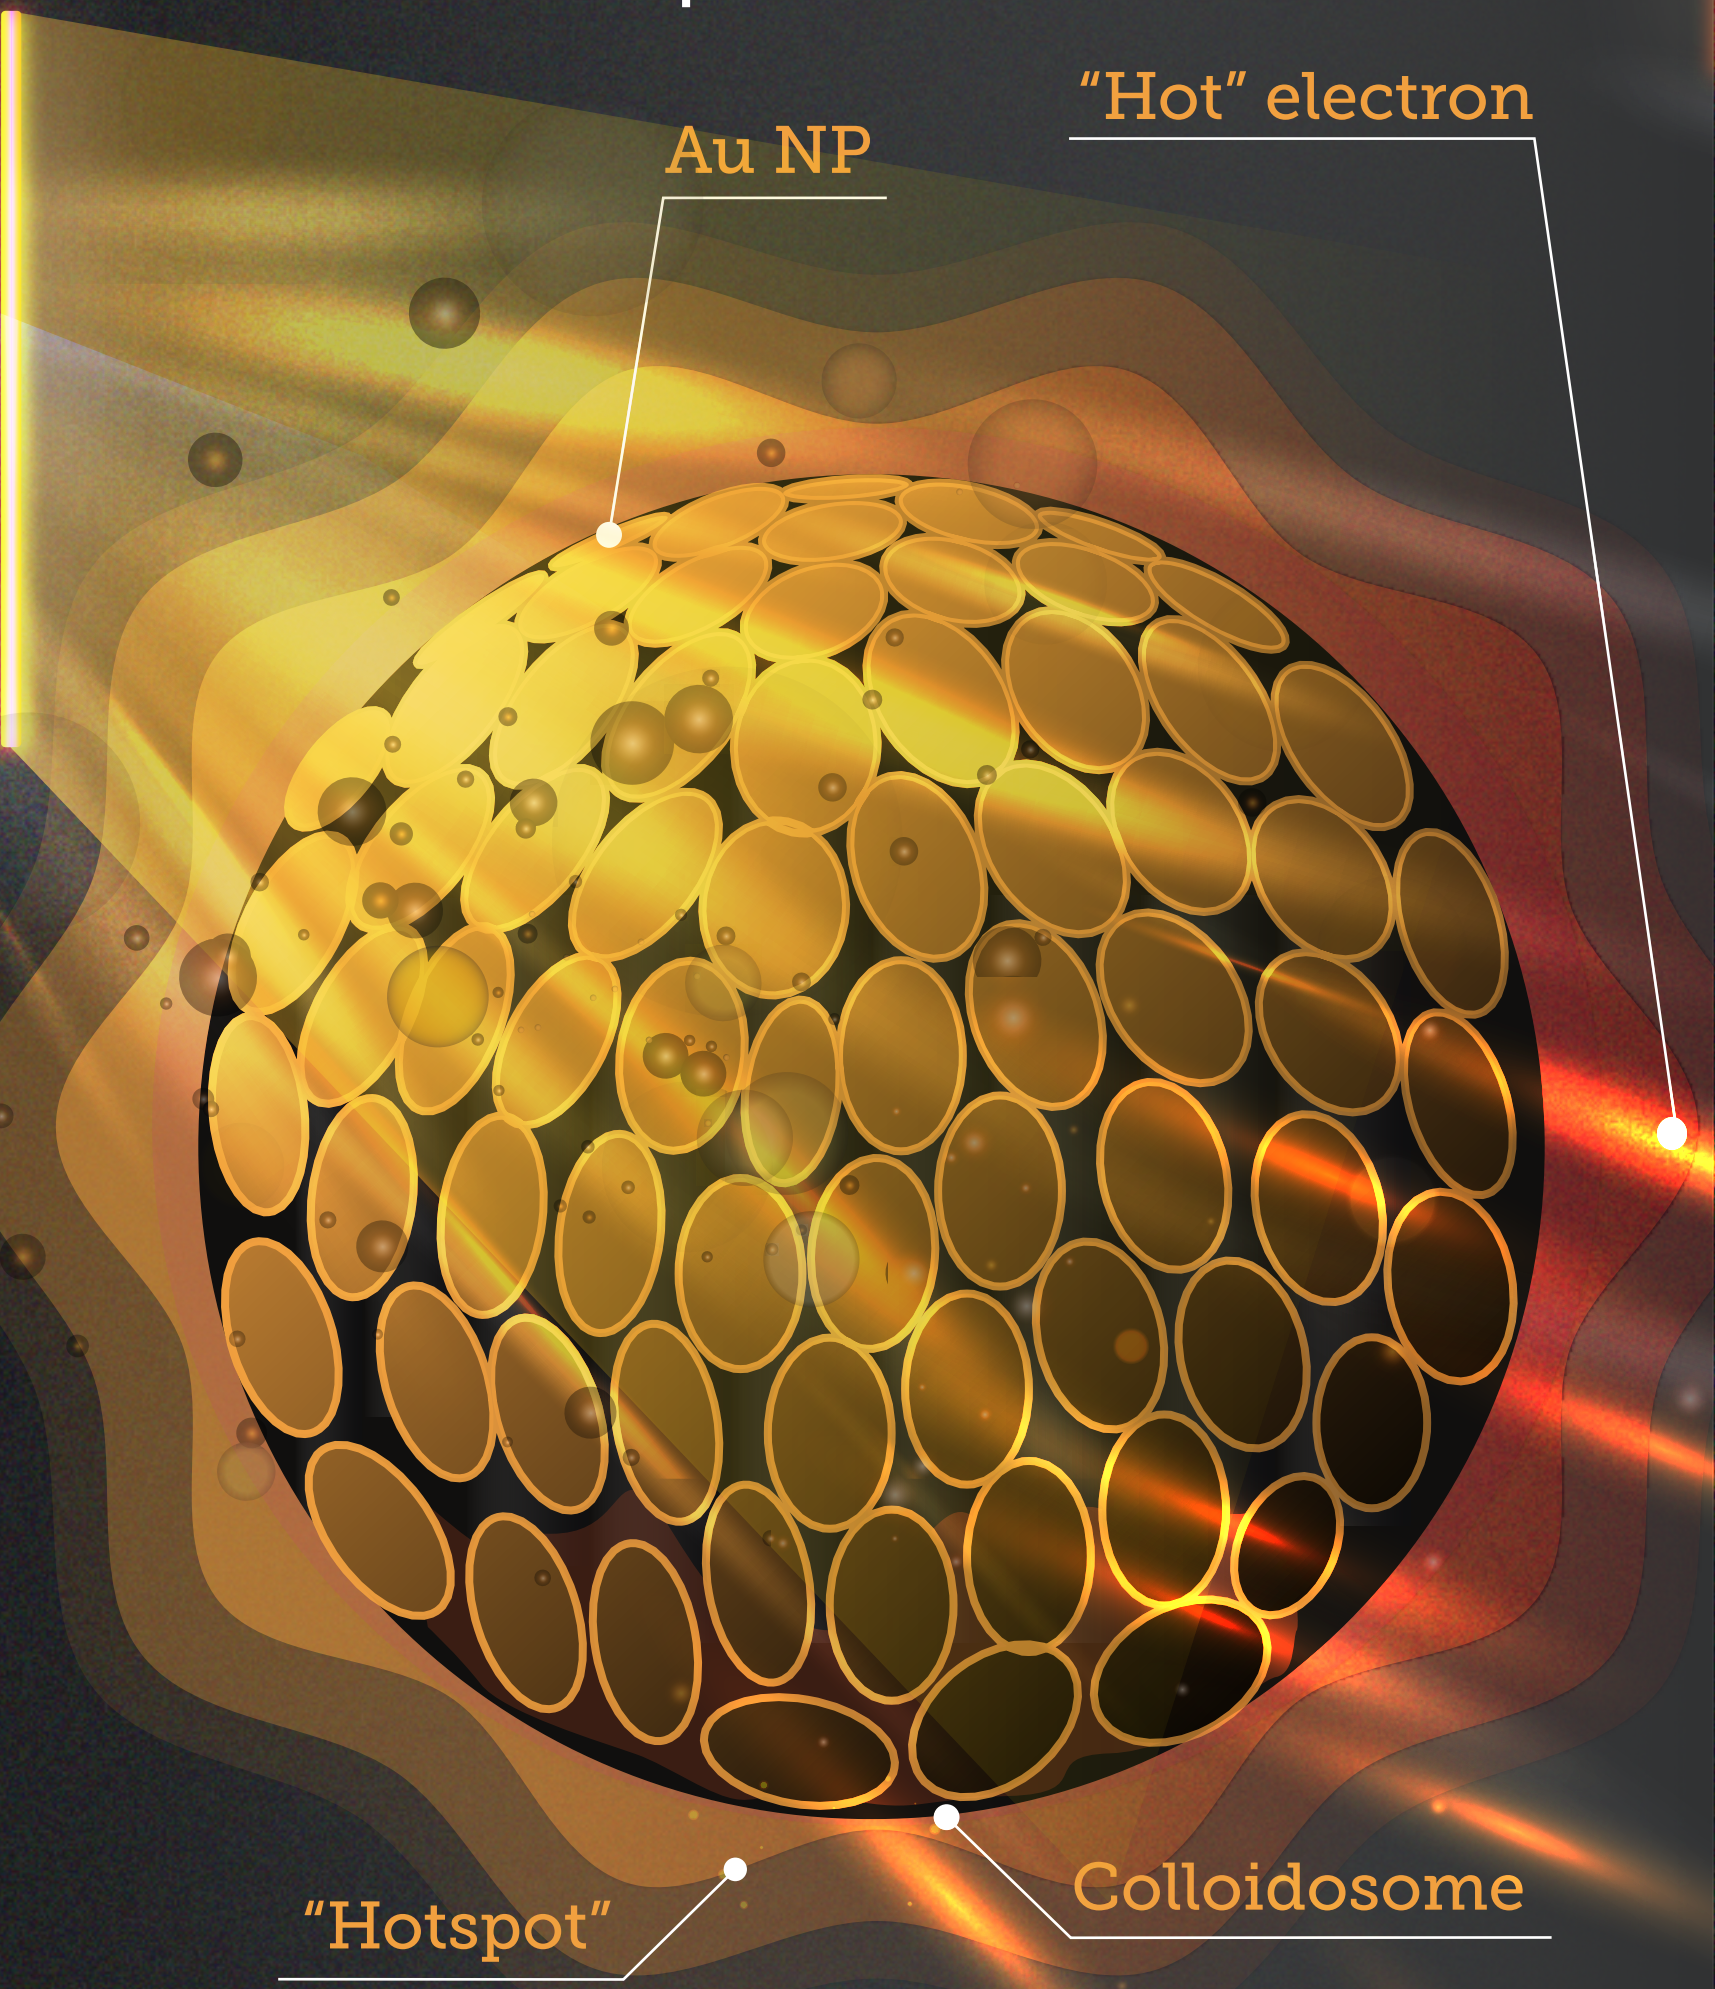

Black (nano)gold can be used for solar energy harvesting

To improve the catalyst's efficiency, "hotspots" in colloidosomes can be tuned by tuning the size and gaps between Au NPs

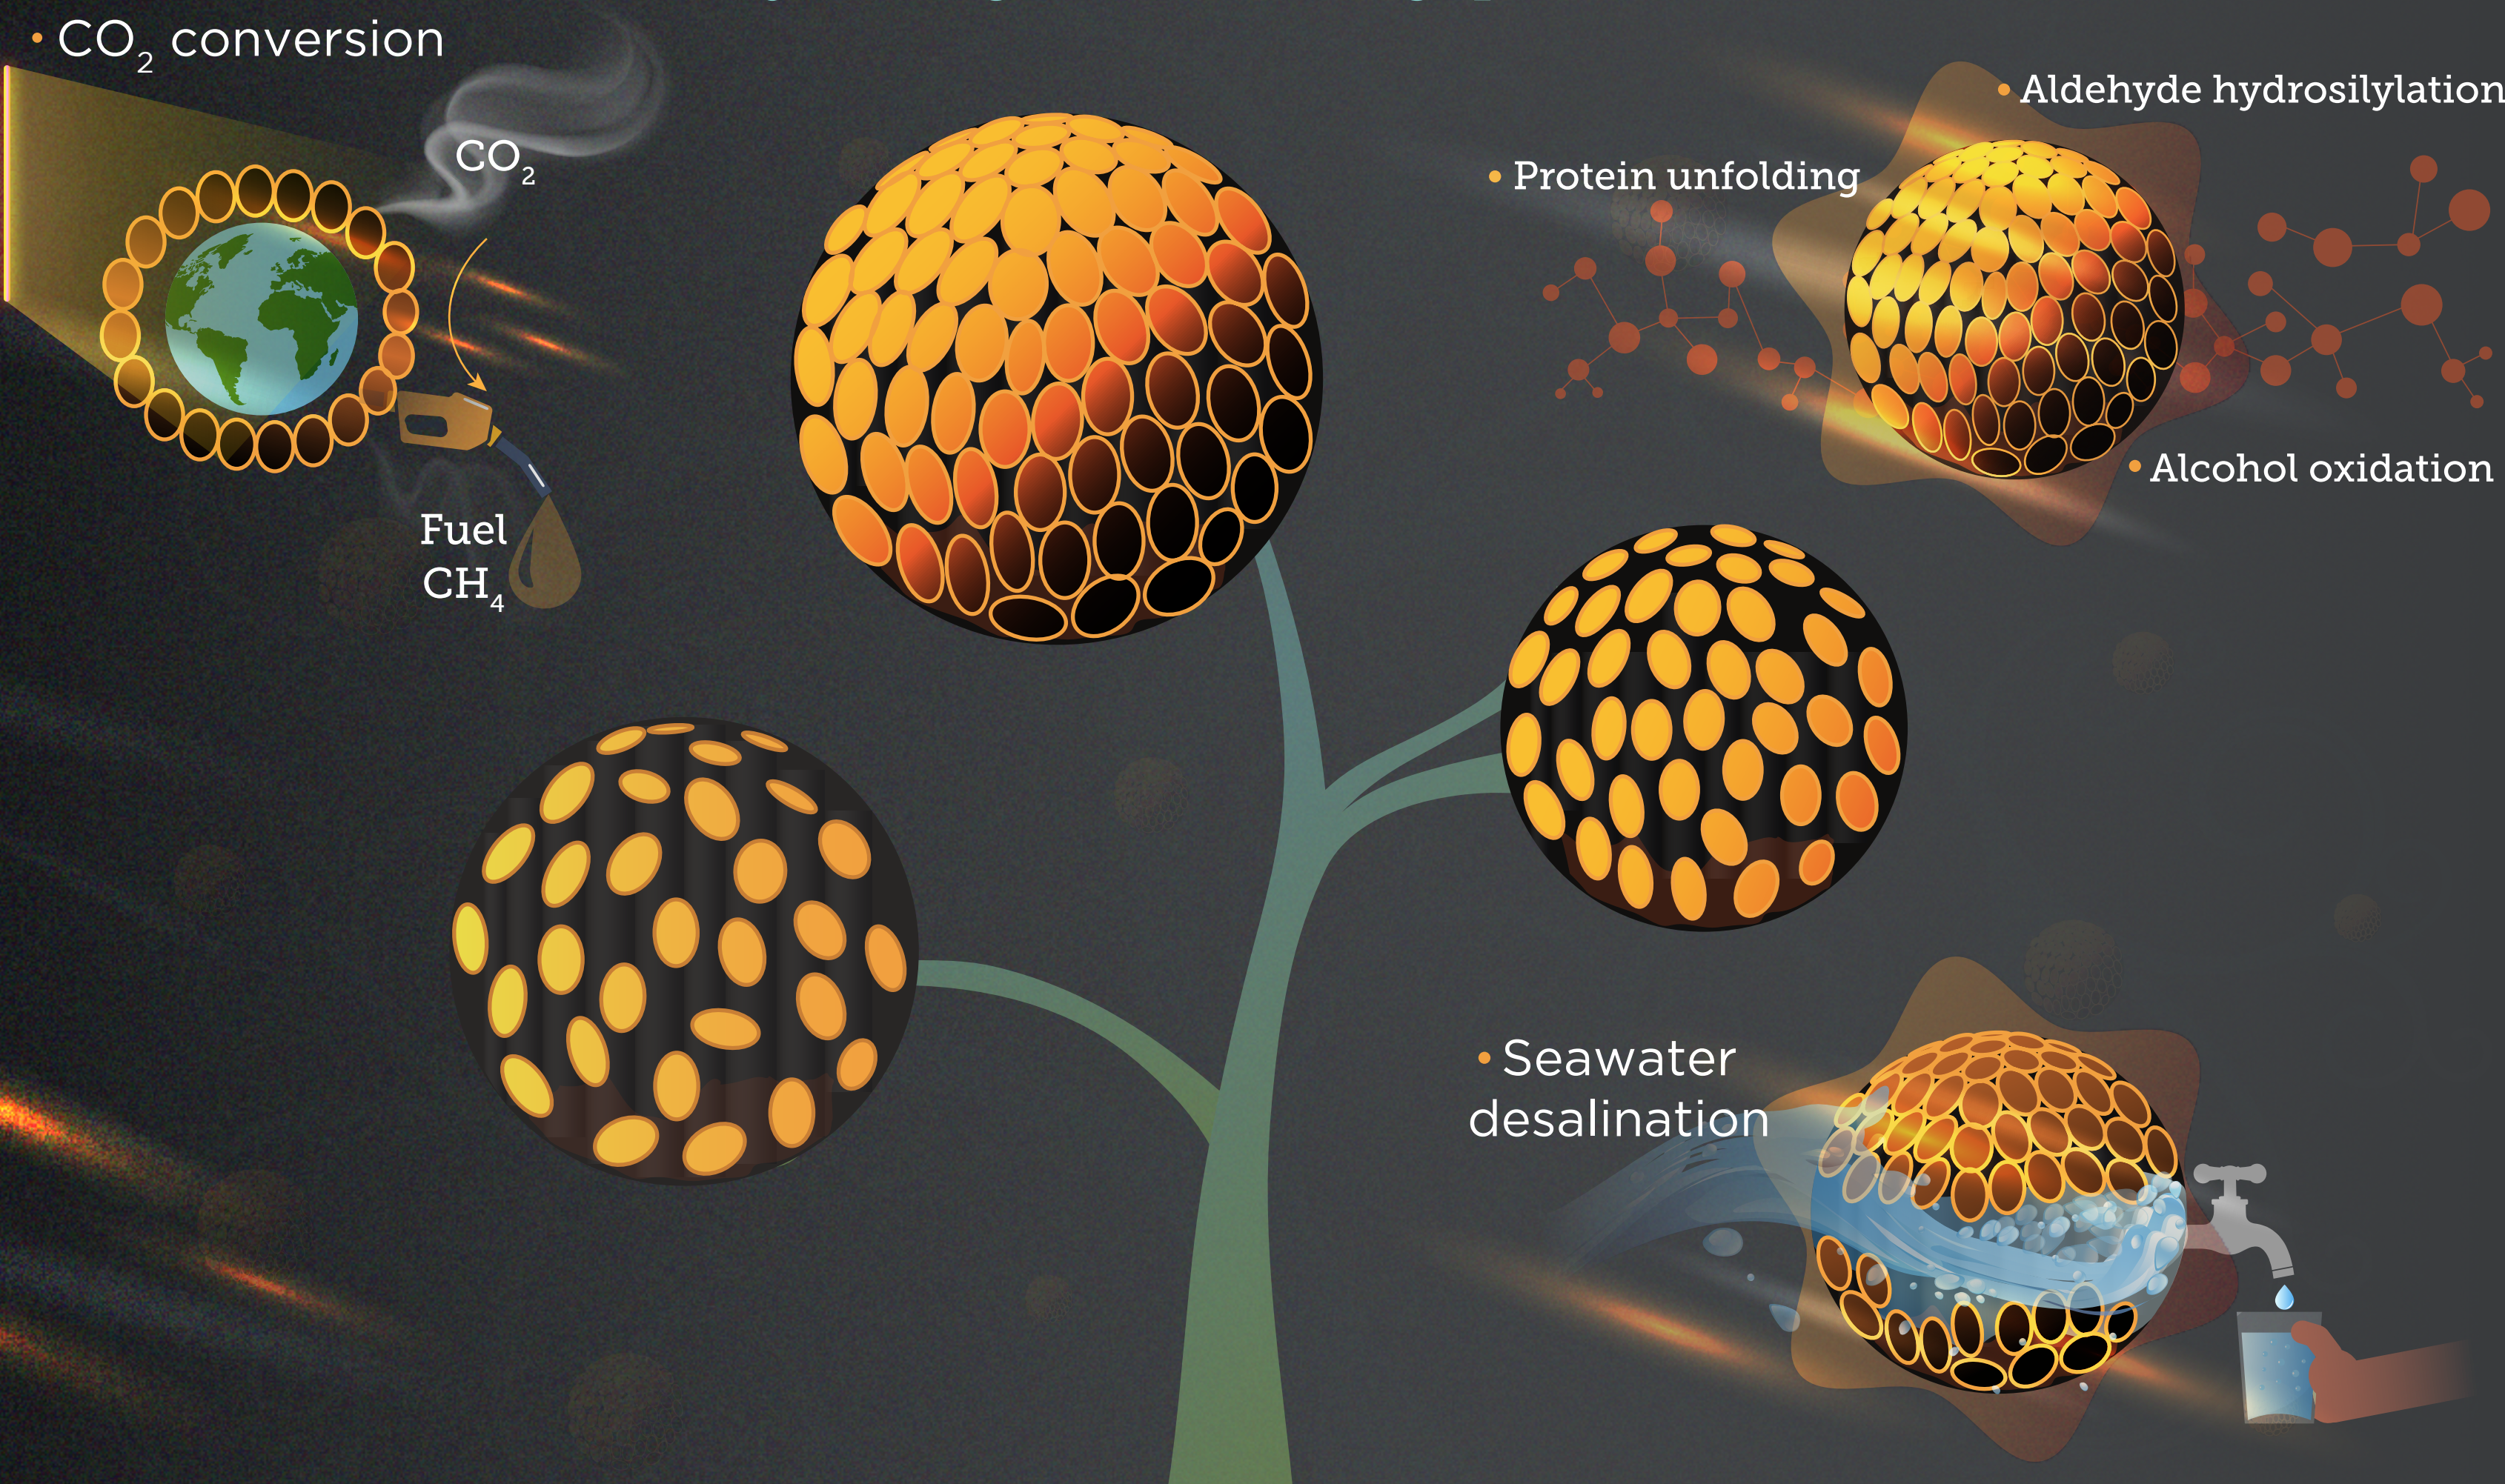

The use of black gold can help us move one step closer to combating climate change
