# Supplementary material for: Plasmonic colloidosomes of black gold for solar energy harvesting and hotspots directed catalysis for CO2 to fuel conversion
Source: PubMed Central journal article supplement (PMC6625417; doi:10.1039/c9sc02369k), 2019-07-03
Supplement: SC-010-C9SC02369K-s001.pdf [file SC-010-C9SC02369K-s001.pdf]

# Plasmonic Colloidosomes of Black Gold for Solar Energy Harvesting and Hotspots Directed Catalysis for CO<sub>2</sub> to Fuel Conversion

Mahak Dhiman,<sup>[a]#</sup> Ayan Maity,<sup>[a]#</sup> Anirban Das,<sup>[a]</sup> Rajesh Belgamwar,<sup>[a]</sup> Bhagyashree Chalke,<sup>[b]</sup> Yeonhee Lee,<sup>[c]</sup> Kyunjong Sim,<sup>[c]</sup> Jwa-Min Nam,<sup>[c]</sup> Vivek Polshettiwar\*<sup>[a]</sup>

<sup>a</sup>Department of Chemical Sciences, <sup>b</sup>Department of Condensed Matter Physics and Materials Science, Tata Institute of Fundamental Research (TIFR), Mumbai, India. Email: vivekpol@tifr.res.in,

<sup>c</sup>Department of Chemistry, Seoul National University, Seoul, South Korea. # shared co-authors

**Table S1.** Au Loading, BET surface area and total pore volume of DPC-Cx with various growth cycles.

| Entry | Sample         | Au loading (wt. %) | BET Surface Area (m <sup>2</sup> /g) | Total BJH Pore Volume (cm <sup>3</sup> /g) |
|-------|----------------|--------------------|--------------------------------------|--------------------------------------------|
| 1     | Silica Spheres | 0                  | 551                                  | 0.6                                        |
| 2     | DPC-C0         | 4.9                | 359                                  | 0.5                                        |
| 3     | DPC-C1         | 22                 | 340                                  | 0.4                                        |
| 4     | DPC-C3         | 48                 | 347                                  | 0.5                                        |
| 5     | DPC-C4         | 55                 | 244                                  | 0.4                                        |
| 6     | DPC-C6         | 68                 | 134                                  | 0.2                                        |

Standard error in measurements: Au loading  $\pm$  10 %, surface area  $\pm$  4%, pore volume  $\pm$  0.01.

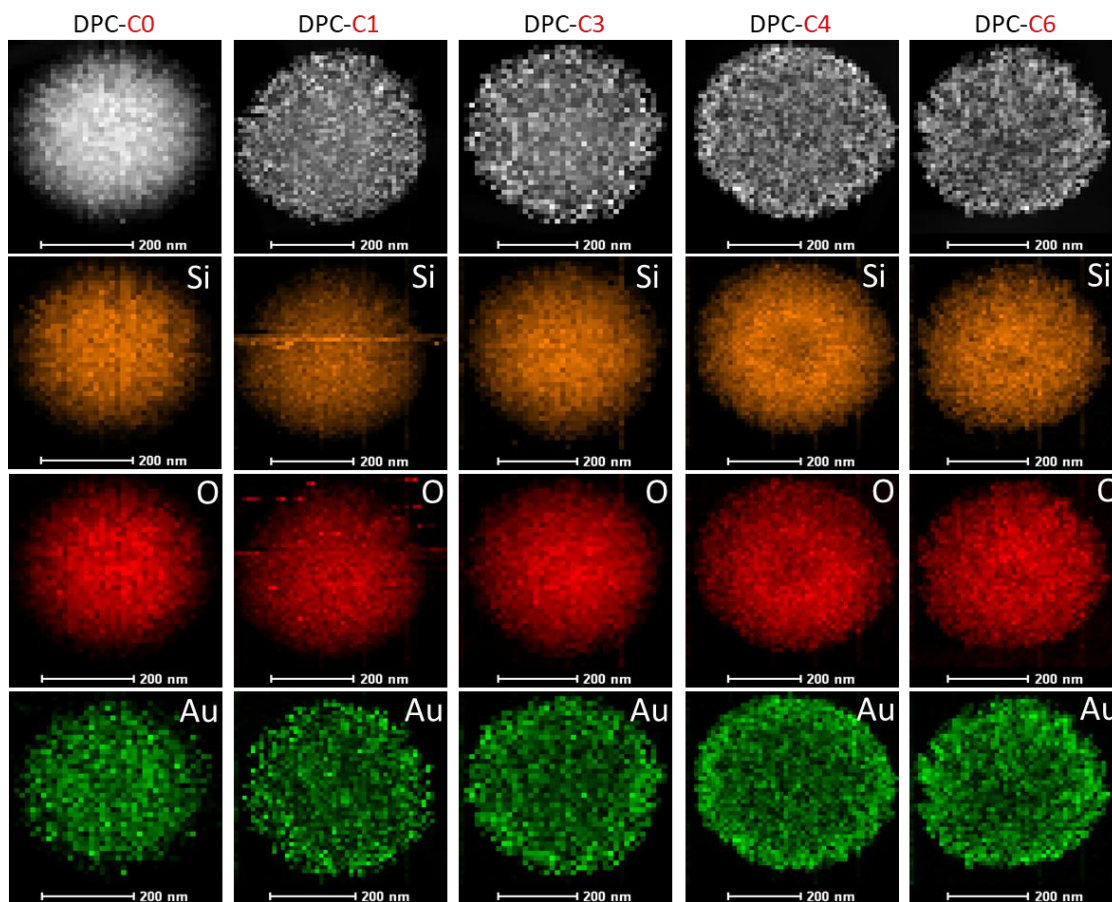

**Figure S1.** EDS elemental mapping of DPC-C<sub>x</sub> for Si, O and Au atoms.

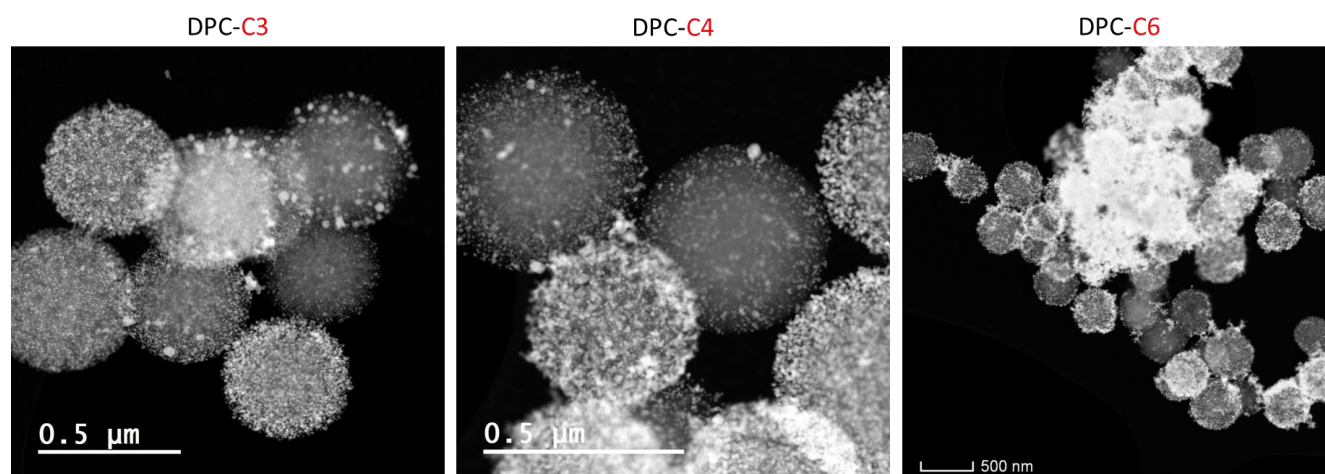

**Figure S2.** Low magnification STEM image of DPC-C<sub>3</sub>, DPC-C<sub>4</sub> and DPC-C<sub>6</sub>.

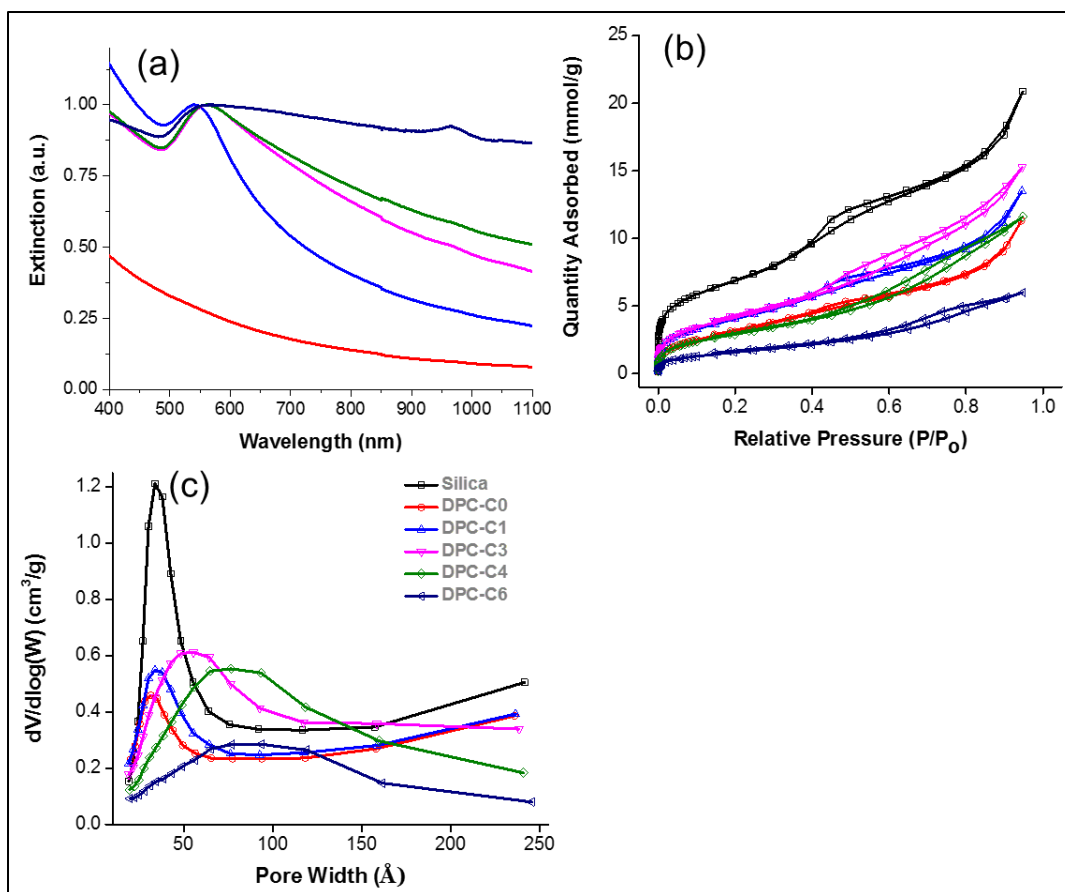

**Figure S3.** (a) Extinction spectrum, (b) N<sub>2</sub> sorption isotherms and (c) BJH pore size distribution of DPC-C<sub>x</sub> with various numbers of growth cycles.

All N<sub>2</sub> sorption isotherms were of type IV with a H3 hysteresis loop. The pore-size distribution curves (Figure S3c) indicate that the pores, which were approximately ~ 4 nm, were blocked after amine functionalization, while the mesopores remained intact even after Au loading. This allowed the better accessibility of Au NPs, as well as enhanced mass transport of reactants and products. The surface area and pore volume of DPC-C<sub>x</sub> are summarized in Table S1. In terms of porosity, despite high Au loading, DPC-C<sub>x</sub> materials possessed considerable porosity (Figure S3b). Surface area was reduced from 551 m<sup>2</sup>g<sup>-1</sup> of silica spheres to 340 m<sup>2</sup>g<sup>-1</sup> of DPC-C1 after 1<sup>st</sup> growth cycle due to 22 wt.% Au loading (Table S1). The surface area was further decreased in DPC-C3, DPC-C4 and DPC-C6 and was measured to be 347, 244 and 134 m<sup>2</sup>g<sup>-1</sup>, respectively (Table S1).

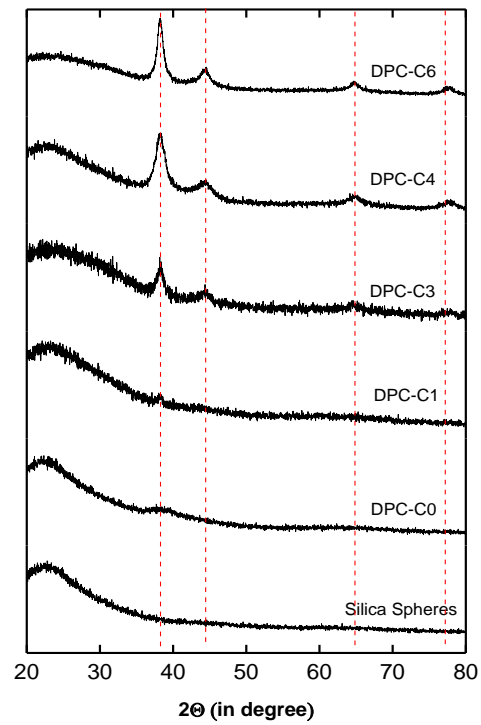

**Figure S4.** Powder X-ray diffraction (PXRD) of DPC-Cx with various growth cycles.

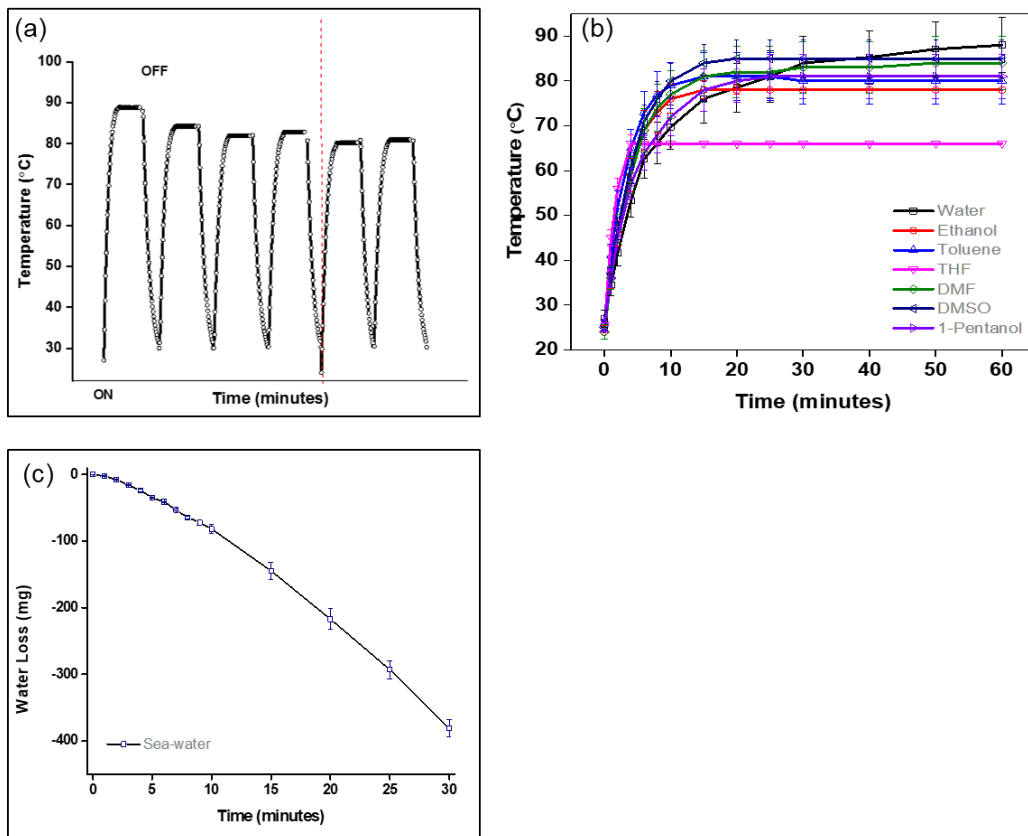

**Figure S5.** (a) DPC-C4 recyclability for water heating experiments for six heating-cooling cycles. To check the stability of the DPC-C4 during the heat generation, multiple cycles of heat measurements were carried out by switching light ON and OFF for 30 minutes of the time interval. The experiment was performed by exposing 5 mg of DPC-C4 catalyst in 5 mL of water to Vis-NIR light (400-1100 nm) for 30 minutes and then switching off the light for the next 30 minutes. Once the temperature reached 30°C, the light was again switched ON and the increase in temperature with respect to time was monitored. Red line indicates the gap of 24 hours before resuming further recyclability study; (b) Effect of solvent on DPC-C4 heating behavior; (c) DPC-C4 as nano-heaters to convert seawater to drinkable water.

**Table S2.** Measurement of thermal efficiency of the steam generation process.

Thermal efficiency ( $\eta$ ) of the photothermal material was estimated by the following equation:

$$\eta = \frac{Q_e}{Q_s}$$

Where  $Q_s$  is the incidence of light power, and  $Q_e$  is the power of evaporation of the water, which can be estimated by the equation:

$$Q_e = \frac{dm * He}{dt} = v * He$$

Where  $m$  is the mass of evaporated water,

$t$  is time,

$v$  is the evaporation rate of water, and

$He$  is the heat of evaporation of water ( $\approx 2260 \text{ kJ kg}^{-1}$ ).

| <b>Sample</b> | <b><math>v</math> (kg m<sup>-2</sup> h<sup>-1</sup>)</b> | <b><math>Q_e</math> (kJ m<sup>-2</sup> h<sup>-1</sup>)</b> | <b><math>Q_s</math> (W m<sup>-2</sup>)</b> | <b><math>\eta</math> (%)</b> |
|---------------|----------------------------------------------------------|------------------------------------------------------------|--------------------------------------------|------------------------------|
| DPC-C0        | 2.6                                                      | 5966                                                       | 6900                                       | 24                           |
| DPC-C1        | 3.5                                                      | 7910                                                       | 6900                                       | 32                           |
| DPC-C3        | 7.2                                                      | 16272                                                      | 6900                                       | 65                           |
| DPC-C4        | 8.6                                                      | 19436                                                      | 6900                                       | 78                           |
| DPC-C6        | 7.1                                                      | 16046                                                      | 6900                                       | 64                           |

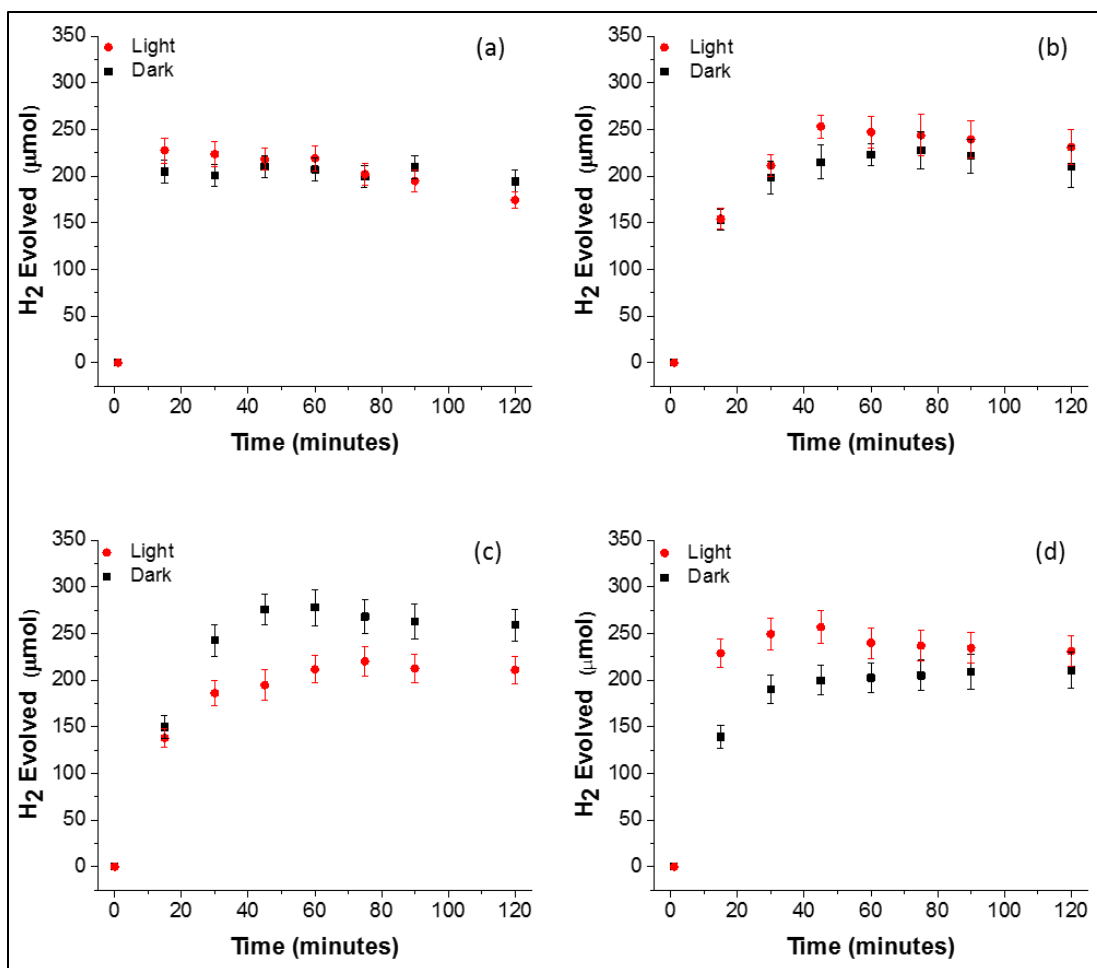

**Figure S6.** ABC decomposition in the dark at respective temperatures and in light, (a) using DPC-C1 at 64°C, (b) using DPC-C3 at 70°C, (c) using DPC-C4 at 74°C and (d) using DPC-C6 at 68°C.

**Table S3.** Measurement of localized temperatures in DPC-Cx materials.

Temperature was determined using the following equation:

$$\frac{I_{as}}{I_s} = \left( \frac{(V_i + V_v)^4}{(V_i - V_v)^4} \right) e \left( -\frac{hV_v}{kT} \right)$$

where;

**I<sub>as</sub>** is the anti-Stokes signal strength,

**I<sub>s</sub>** is the Stokes signal strength,

**V<sub>i</sub>** is the laser frequency (15797.8 cm<sup>-1</sup>),

$Vv$  is the vibrational mode frequency (in  $\text{cm}^{-1}$ ),

$h$  is Planck's constant =  $6.626176 \times 10^{-34}$  Js,

$k$  is Boltzmann's constant =  $1.3807 \times 10^{-23}$  JK<sup>-1</sup>, and

$T$  is the temperature (in K).

To minimize the effect of heterogeneity in Au-coating on temperature, data was acquired from eight different points for each sample.

The temperature was determined using the following steps:

1. The ratio of  $I_{as}$  and  $I_s$  was taken,  $\left(\frac{I_{as}}{I_s}\right)$
2. To simplify the final equation for temperature calculation, a factor  $Z$  was introduced where,

$$Z = \left(\frac{I_{as}}{I_s}\right) / \left(\frac{(V_i+Vv)^4}{(V_i-Vv)^4}\right)$$

3. Finally, the temperature ( $T$ ) was determined as,

$$T = -\frac{hVv}{(k \ln(Z))}$$

| Sample        | Poi<br>nt | Ias | Is   | Ias/Is   | Vv   | Z        | Temp.<br>(K) | Temp.<br>(°C) |
|---------------|-----------|-----|------|----------|------|----------|--------------|---------------|
| <b>DPC-C3</b> |           |     |      |          |      |          |              |               |
|               | 1         | 22  | 1315 | 0.01673  | 1071 | 0.009718 | 333          | 60            |
|               | 2         | 82  | 2354 | 0.034834 | 1070 | 0.020245 | 395          | 122           |
|               | 3         | 68  | 2629 | 0.025865 | 1070 | 0.015033 | 367          | 94            |
|               | 4         | 71  | 1518 | 0.046772 | 1071 | 0.02717  | 428          | 155           |
|               | 5         | 70  | 1931 | 0.036251 | 1071 | 0.021058 | 399          | 126           |
|               | 6         | 98  | 2366 | 0.04142  | 1070 | 0.024073 | 413          | 140           |



|               |   |     |      |          |      |          |     |     |
|---------------|---|-----|------|----------|------|----------|-----|-----|
|               | 7 | 43  | 1174 | 0.036627 | 1071 | 0.021276 | 400 | 127 |
|               | 8 | 118 | 3294 | 0.035823 | 1068 | 0.020841 | 397 | 124 |
| <b>DPC-C4</b> |   |     |      |          |      |          |     |     |
|               | 1 | 145 | 3089 | 0.046941 | 1068 | 0.027309 | 512 | 154 |
|               | 2 | 38  | 1307 | 0.029074 | 1073 | 0.016872 | 443 | 105 |
|               | 3 | 101 | 2403 | 0.042031 | 1070 | 0.024428 | 494 | 142 |
|               | 4 | 142 | 4805 | 0.029553 | 1068 | 0.017193 | 443 | 105 |
|               | 5 | 120 | 3108 | 0.03861  | 1070 | 0.02244  | 481 | 133 |
|               | 6 | 74  | 2009 | 0.036834 | 1071 | 0.021397 | 475 | 128 |
|               | 7 | 30  | 850  | 0.035294 | 1073 | 0.020481 | 469 | 124 |
|               | 8 | 67  | 2838 | 0.023608 | 1068 | 0.013735 | 416 | 86  |
| <b>DPC-C6</b> |   |     |      |          |      |          |     |     |
|               | 1 | 53  | 2863 | 0.018512 | 1073 | 0.010743 | 341 | 68  |
|               | 2 | 205 | 7003 | 0.029273 | 1066 | 0.017048 | 377 | 104 |
|               | 3 | 161 | 5963 | 0.027    | 1071 | 0.015684 | 371 | 98  |
|               | 4 | 73  | 2404 | 0.030366 | 1071 | 0.017639 | 382 | 109 |
|               | 5 | 146 | 4581 | 0.031871 | 1070 | 0.018523 | 386 | 113 |
|               | 6 | 204 | 5081 | 0.04015  | 1066 | 0.023382 | 409 | 136 |
|               | 7 | 85  | 2787 | 0.030499 | 1075 | 0.017681 | 384 | 111 |
|               | 8 | 151 | 5236 | 0.028839 | 1073 | 0.016735 | 378 | 105 |

\* There was a minor shift in Stokes & anti-Stokes lines for C-S stretching mode of  $\pm 5 \text{ cm}^{-1}$ . Raman spectrum was mixed with Raman reporter signal and background signal. So, the background subtraction process was applied.

**Table S4:** SERS signals of 4-ATP on DPC-Cx materials.

| <b>SERS Peak<br/>(cm<sup>-1</sup>)</b> | <b>Peak Assignments</b>        |
|----------------------------------------|--------------------------------|
| 1005                                   | $\gamma$ (CC) + $\gamma$ (CCC) |
| 1073                                   | $\nu$ (CS)                     |
| 1137                                   | $\nu$ (CH)                     |
| 1182                                   | $\delta$ (CH)                  |
| 1385                                   | $\nu$ (NC)                     |
| 1429                                   | $\nu$ (CC) + $\delta$ (CH)     |
| 1570                                   | $\nu$ (CC)                     |

**Table S5.** Catalysis optimization for the cinnamyl alcohol (COL) oxidation reaction. Selectivity reported was for cinnamaldehyde (CAL).

| <b>Catalyst Name</b> | <b>Catalyst Amount (mg)</b> | <b>Light/Dark</b> | <b>Temperature (°C)</b> | <b>COL (mmol)</b> | <b>Conversion (%)</b> | <b>Selectivity (%)</b> |
|----------------------|-----------------------------|-------------------|-------------------------|-------------------|-----------------------|------------------------|
| DPC-C1               | 20                          | Light             | 23                      | 0.5               | 20                    | 96                     |
| DPC-C1               | 20                          | Dark              | 23                      | 0.5               | 9                     | 97                     |
| DPC-C4               | 20                          | Dark              | 68                      | 0.5               | 11                    | 97                     |
| DPC-C4               | 10                          | Light             | 23                      | 0.5               | 30                    | 94                     |
| DPC-C4               | 10                          | Light             | 23                      | 0.1               | 90                    | 78                     |
| DPC-C4               | 5                           | Light             | 23                      | 0.1               | 12                    | 99                     |
| DPC-C4               | 10                          | Dark              | 23                      | 0.1               | 7                     | 99                     |
| DPC-C4               | 10                          | Dark              | 78                      | 0.1               | 24                    | 94                     |

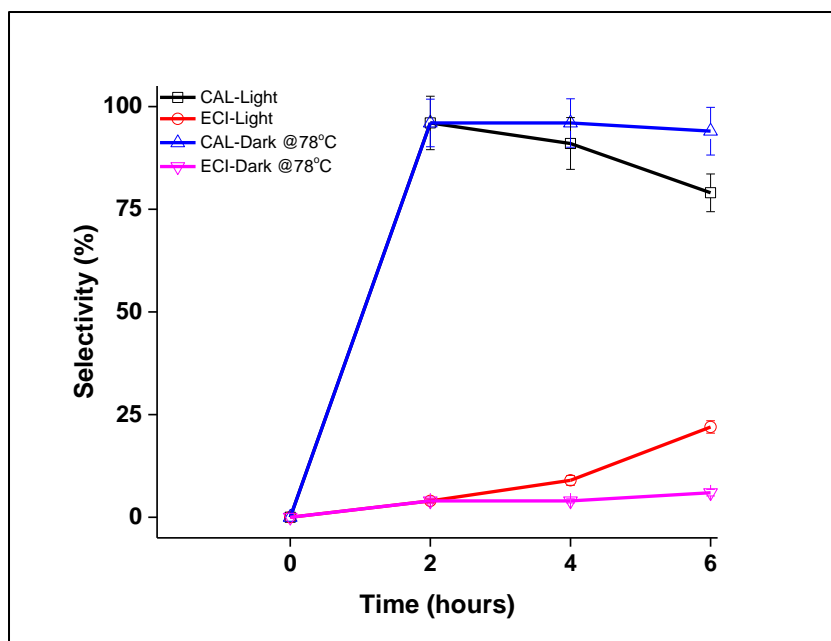

**Figure S7.** The difference in selectivity between cinnamaldehyde (CAL) and ethyl cinnamate (ECI) in light and dark at respective temperature, using DPC-C4 as a catalyst.

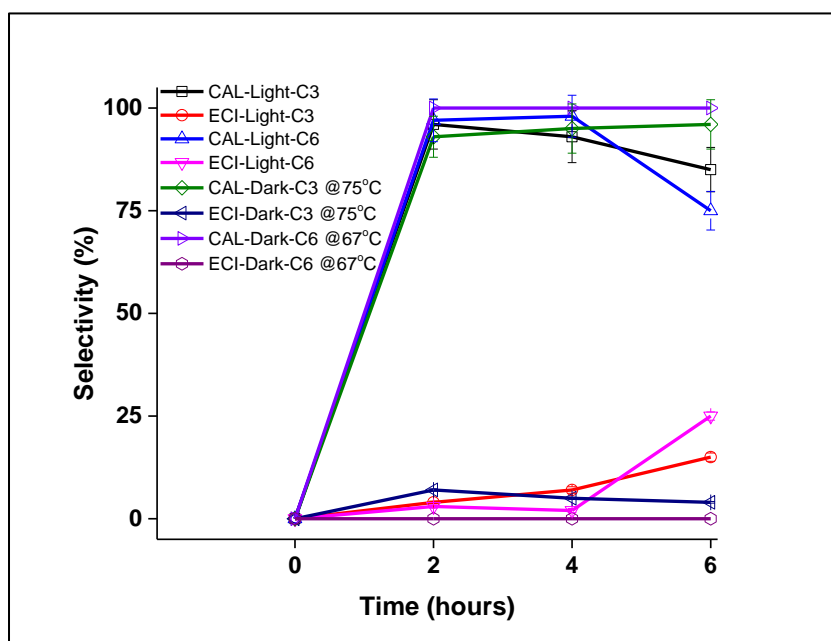

**Figure S8.** The difference in selectivity between cinnamaldehyde (CAL) and ethyl cinnamate (ECI) in light and dark at respective temperature, using DPC-C3 and DPC-C6 as catalysts.

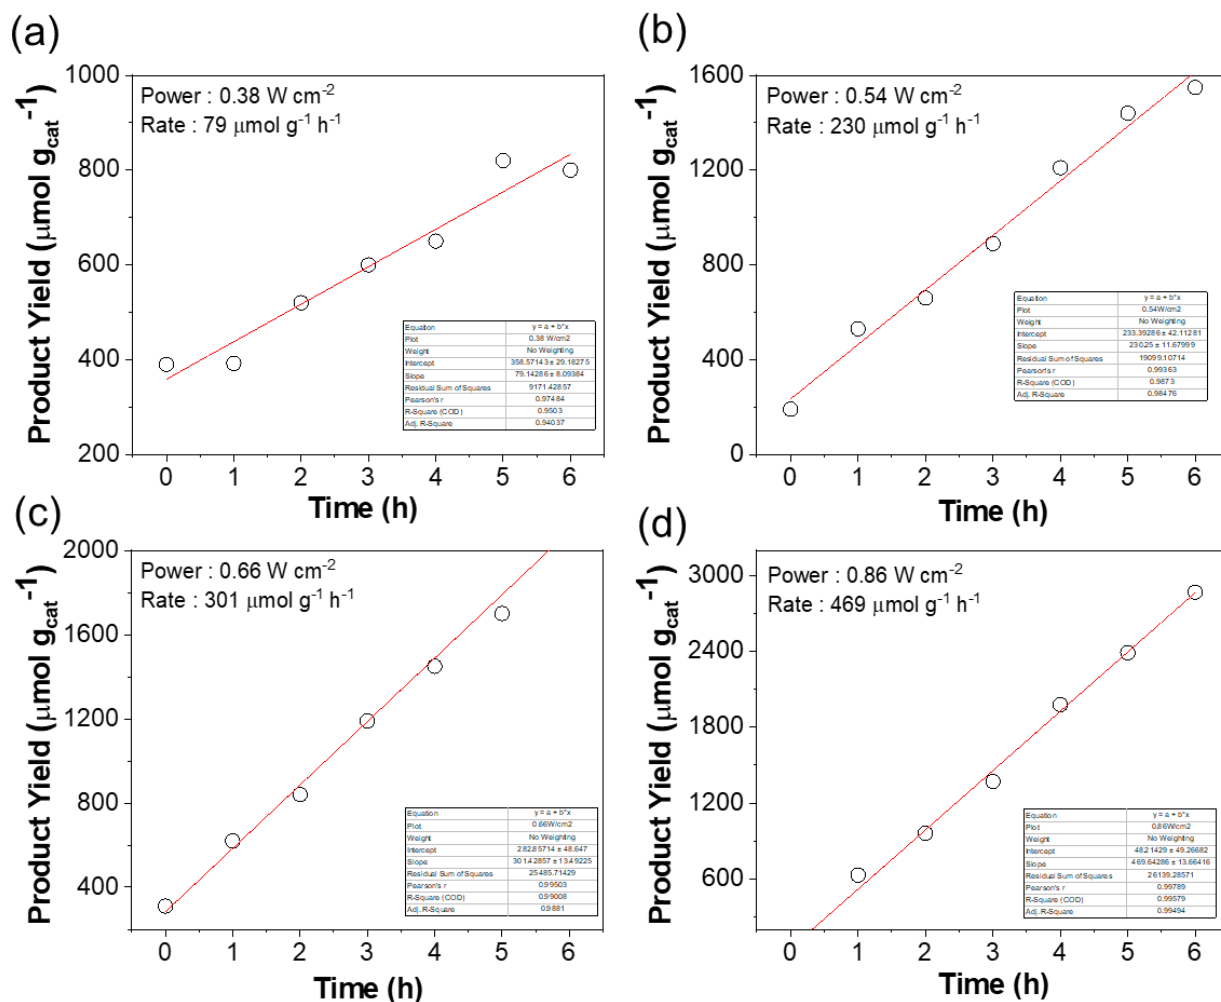

**Figure S9.** Product yield for hydrosilylation of aldehydes using DPC-C4 using VIS-IR light with varying intensities, a) 0.38, b) 0.54, c) 0.66, and d) 0.86 W cm<sup>-2</sup>.

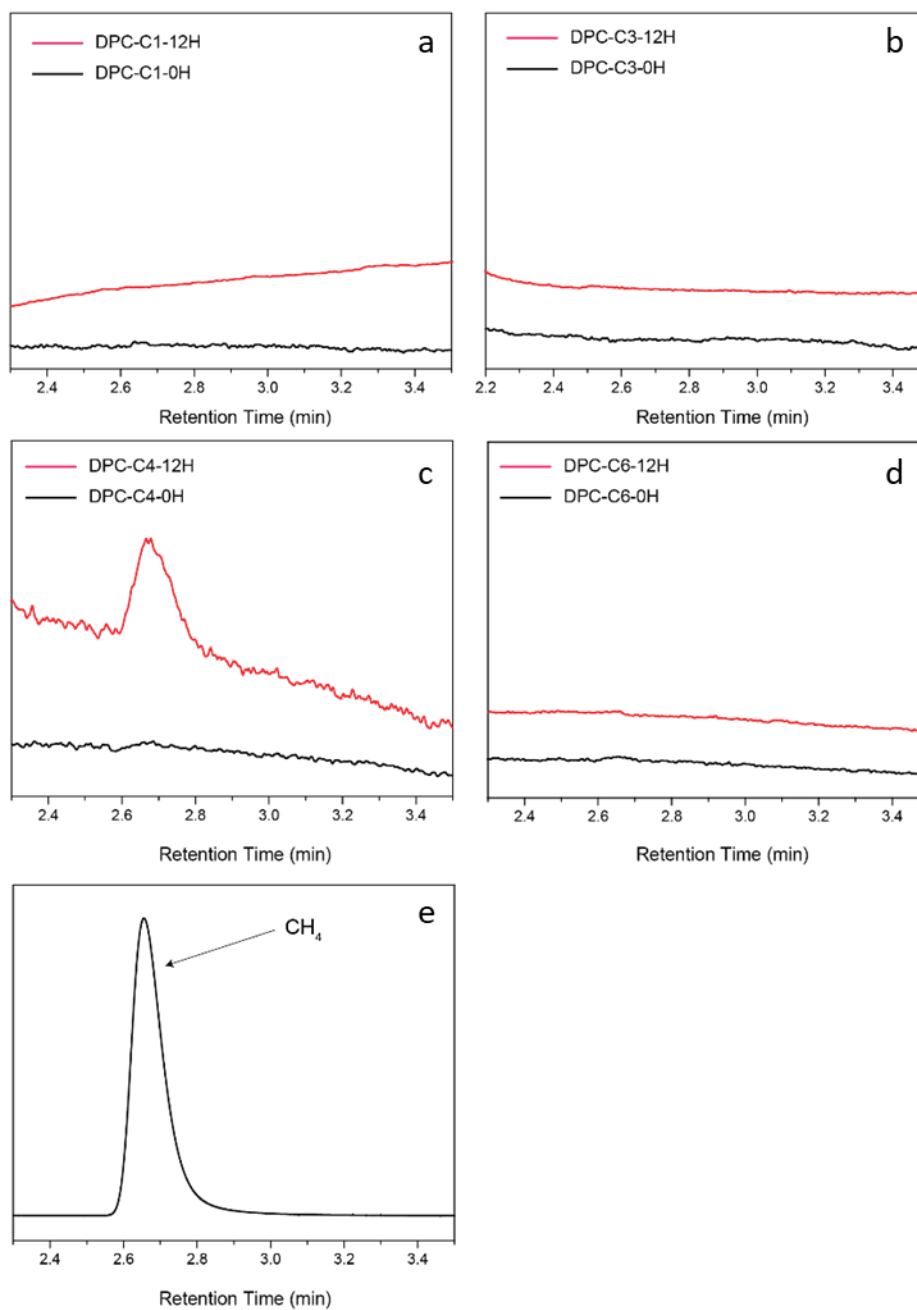

**Figure S10.** Detection of the product (methane) of photocatalytic CO<sub>2</sub> reduction reaction catalyzed by a) DPC-C1, (b) DPC-C3, (c) DPC-C4 and (d) DPC-C6, using micro-GC with thermal conductivity detector (TCD); (e) methane signal retention time of pure methane gas.
